# Supplementary material
Source: publisher figshare collection journal article supplement (https://acs.figshare.com/ndownloader/files/16641833)

# checkCIF/PLATON report

You have not supplied any structure factors. As a result the full set of tests cannot be run.

THIS REPORT IS FOR GUIDANCE ONLY. IF USED AS PART OF A REVIEW PROCEDURE FOR PUBLICATION, IT SHOULD NOT REPLACE THE EXPERTISE OF AN EXPERIENCED CRYSTALLOGRAPHIC REFEREE.

No syntax errors found.      CIF dictionary      Interpreting this report

## Datablock: I

---

|                 |                                                                       |                                           |
|-----------------|-----------------------------------------------------------------------|-------------------------------------------|
| Bond precision: | C-C = 0.0097 A                                                        | Wavelength=1.54178                        |
| Cell:           | a=37.7211(9)                                                          | b=20.6072(5)      c=21.3384(5)            |
|                 | alpha=90                                                              | beta=90      gamma=90                     |
| Temperature:    | 100 K                                                                 |                                           |
|                 | Calculated                                                            | Reported                                  |
| Volume          | 16586.9(7)                                                            | 16586.9(7)                                |
| Space group     | P 21 21 2                                                             | P 21 21 2                                 |
| Hall group      | P 2 2ab                                                               | P 2 2ab                                   |
| Moiety formula  | 2(C80 H78 N8 O16),<br>2(C79.70 H77.55 N8<br>O15.85), 10.186(C H Cl3), | 11.59(C H Cl3), 4(C80 H78<br>N8 O16), H2O |
| Sum formula     | C331.89 H323.59 Cl34.76<br>N32 O65                                    | C331.89 H325.58 Cl34.75<br>N32 O65        |
| Mr              | 7032.63                                                               | 7034.32                                   |
| Dx,g cm-3       | 1.408                                                                 | 1.408                                     |
| Z               | 2                                                                     | 2                                         |
| Mu (mm-1)       | 3.283                                                                 | 3.282                                     |
| F000            | 7299.6                                                                | 7303.0                                    |
| F000'           | 7344.57                                                               |                                           |
| h,k,lmax        | 45,24,25                                                              | 45,23,25                                  |
| Nref            | 30884[ 16586]                                                         | 30115                                     |
| Tmin,Tmax       | 0.854,0.906                                                           | 0.635,0.753                               |
| Tmin'           | 0.697                                                                 |                                           |

Correction method= MULTI-SCAN

Data completeness= 1.82/0.98      Theta(max)= 69.077

R(reflections)= 0.0624( 23665)      wR2(reflections)= 0.1675( 30115)

S = 1.010      Npar= 2497

---

The following ALERTS were generated. Each ALERT has the format

**test-name\_ALERT\_alert-type\_alert-level.**

Click on the hyperlinks for more details of the test.

### Alert level B

|                   |                                                |     |        |
|-------------------|------------------------------------------------|-----|--------|
| PLAT201_ALERT_2_B | Isotropic non-H Atoms in Main Residue(s) ..... | 1   | Report |
| PLAT220_ALERT_2_B | Large Non-Solvent C Ueq(max)/Ueq(min) Range    | 7.3 | Ratio  |
| PLAT220_ALERT_2_B | Large Non-Solvent C Ueq(max)/Ueq(min) Range    | 6.7 | Ratio  |

### Alert level C

|                   |                                                  |              |
|-------------------|--------------------------------------------------|--------------|
| PLAT041_ALERT_1_C | Calc. and Reported SumFormula Strings Differ     | Please Check |
| PLAT068_ALERT_1_C | Reported F000 Differs from Calcd (or Missing)... | Please Check |
| PLAT089_ALERT_3_C | Poor Data / Parameter Ratio (Zmax < 18) .....    | 6.64 Note    |
| PLAT094_ALERT_2_C | Ratio of Maximum / Minimum Residual Density .... | 2.25 Report  |
| PLAT213_ALERT_2_C | Atom O14 has ADP max/min Ratio .....             | 3.4 prolat   |
| PLAT220_ALERT_2_C | Large Non-Solvent O Ueq(max)/Ueq(min) Range      | 4.4 Ratio    |
| PLAT220_ALERT_2_C | Large Non-Solvent C Ueq(max)/Ueq(min) Range      | 5.2 Ratio    |
| PLAT220_ALERT_2_C | Large Non-Solvent O Ueq(max)/Ueq(min) Range      | 3.4 Ratio    |
| PLAT220_ALERT_2_C | Large Non-Solvent O Ueq(max)/Ueq(min) Range      | 5.1 Ratio    |
| PLAT222_ALERT_3_C | Large Non-Solvent H Uiso(max)/Uiso(min) ...      | 7.0 Ratio    |
| PLAT222_ALERT_3_C | Large Non-Solvent H Uiso(max)/Uiso(min) ...      | 6.4 Ratio    |
| PLAT222_ALERT_3_C | Large Non-Solvent H Uiso(max)/Uiso(min) ...      | 5.8 Ratio    |
| PLAT234_ALERT_4_C | Large Hirshfeld Difference C154 -- C162 ..       | 0.18 Ang.    |
| PLAT234_ALERT_4_C | Large Hirshfeld Difference C90 -- C114 ..        | 0.16 Ang.    |
| PLAT242_ALERT_2_C | Low Ueq as Compared to Neighbors for .....       | 0240 Check   |
| PLAT242_ALERT_2_C | Low Ueq as Compared to Neighbors for .....       | C98 Check    |
| PLAT242_ALERT_2_C | Low Ueq as Compared to Neighbors for .....       | C106 Check   |
| PLAT309_ALERT_2_C | Single Bonded Oxygen (C-O > 1.3 Ang) .....       | 0252 Check   |
| PLAT340_ALERT_3_C | Low Bond Precision on C-C Bonds .....            | 0.0097 Ang.  |
| PLAT411_ALERT_2_C | Short Inter H...H Contact H128 .. H183 ..        | 2.02 Ang.    |
| PLAT420_ALERT_2_C | D-H Without Acceptor N9 - H9 ..                  | Please Check |
| PLAT420_ALERT_2_C | D-H Without Acceptor N11 - >H11 ..               | Please Check |
| PLAT420_ALERT_2_C | D-H Without Acceptor N12 - H12 ..                | Please Check |
| PLAT420_ALERT_2_C | D-H Without Acceptor >N13 - >H13 ..              | Please Check |
| PLAT420_ALERT_2_C | D-H Without Acceptor N14 - H14 ..                | Please Check |
| PLAT420_ALERT_2_C | D-H Without Acceptor N16 - H16 ..                | Please Check |
| PLAT790_ALERT_4_C | Centre of Gravity not Within Unit Cell: Resd. #  | 1 Note       |

C80 H78 N8 O16

### Alert level G

FORMU01\_ALERT\_1\_G There is a discrepancy between the atom counts in the  
 \_chemical\_formula\_sum and \_chemical\_formula\_moiety. This is  
 usually due to the moiety formula being in the wrong format.  
 Atom count from \_chemical\_formula\_sum: C331.8899 H325.58 Cl34.75 N  
 Atom count from \_chemical\_formula\_moiety:C331.59 H325.5899 Cl34.77 N

FORMU01\_ALERT\_2\_G There is a discrepancy between the atom counts in the  
 \_chemical\_formula\_sum and the formula from the \_atom\_site\* data.  
 Atom count from \_chemical\_formula\_sum:C331.8899 H325.58 Cl34.75 N32  
 Atom count from the \_atom\_site data: C331.8856 H323.5854 Cl34.75799

CELLZ01\_ALERT\_1\_G Difference between formula and atom\_site contents detected.

CELLZ01\_ALERT\_1\_G WARNING: H atoms missing from atom site list. Is this intentional?  
 From the CIF: \_cell\_formula\_units\_Z 2  
 From the CIF: \_chemical\_formula\_sum C331.89 H325.58 Cl34.75 N32 O65  
 TEST: Compare cell contents of formula and atom\_site data

|      |           |           |      |
|------|-----------|-----------|------|
| atom | Z*formula | cif sites | diff |
| C    | 663.78    | 663.77    | 0.01 |
| H    | 651.16    | 647.17    | 3.99 |

|                   |                                                  |        |         |                  |
|-------------------|--------------------------------------------------|--------|---------|------------------|
| Cl                | 69.50                                            | 69.52  | -0.02   |                  |
| N                 | 64.00                                            | 64.00  | 0.00    |                  |
| O                 | 130.00                                           | 130.00 | 0.00    |                  |
| PLAT002_ALERT_2_G | Number of Distance or Angle Restraints on AtSite |        |         | 99 Note          |
| PLAT003_ALERT_2_G | Number of Uiso or Uij Restrained non-H Atoms ... |        |         | 56 Report        |
| PLAT005_ALERT_5_G | No _iucr_refine_instructions_details in the CIF  |        |         | Please Do !      |
| PLAT007_ALERT_5_G | Number of Unrefined Donor-H Atoms .....          |        |         | 18 Report        |
| PLAT033_ALERT_4_G | Flack x Value Deviates > 2*sigma from Zero ..... |        |         | 0.034 Note       |
| PLAT042_ALERT_1_G | Calc. and Reported MoietyFormula Strings Differ  |        |         | Please Check     |
| PLAT083_ALERT_2_G | SHELXL Second Parameter in WGHT Unusually Large. |        |         | 12.37 Why ?      |
| PLAT301_ALERT_3_G | Main Residue Disorder ..... Percentage =         |        |         | 26 Note          |
| PLAT302_ALERT_4_G | Anion/Solvent Disorder ..... Percentage =        |        |         | 100 Note         |
| PLAT311_ALERT_2_G | Isolated Disordered Oxygen Atom (No H's ?) ..... |        |         | 01 Check         |
| PLAT432_ALERT_2_G | Short Inter X...Y Contact                        | Cl6    | .. C224 | .. 2.61 Ang.     |
| PLAT432_ALERT_2_G | Short Inter X...Y Contact                        | Cl1A   | .. C173 | .. 1.32 Ang.     |
| PLAT432_ALERT_2_G | Short Inter X...Y Contact                        | Cl1C   | .. C170 | .. 3.11 Ang.     |
| PLAT432_ALERT_2_G | Short Inter X...Y Contact                        | Cl12   | .. C173 | .. 1.70 Ang.     |
| PLAT432_ALERT_2_G | Short Inter X...Y Contact                        | Cl13   | .. C154 | .. 3.20 Ang.     |
| PLAT432_ALERT_2_G | Short Inter X...Y Contact                        | Cl14   | .. C173 | .. 1.63 Ang.     |
| PLAT432_ALERT_2_G | Short Inter X...Y Contact                        | Cl15   | .. C173 | .. 1.78 Ang.     |
| PLAT432_ALERT_2_G | Short Inter X...Y Contact                        | Cl15   | .. C26  | .. 3.15 Ang.     |
| PLAT432_ALERT_2_G | Short Inter X...Y Contact                        | Cl20   | .. C165 | .. 3.16 Ang.     |
| PLAT432_ALERT_2_G | Short Inter X...Y Contact                        | Cl26   | .. C173 | .. 1.75 Ang.     |
| PLAT432_ALERT_2_G | Short Inter X...Y Contact                        | Cl30   | .. C173 | .. 2.28 Ang.     |
| PLAT432_ALERT_2_G | Short Inter X...Y Contact                        | Cl33   | .. C145 | .. 2.73 Ang.     |
| PLAT432_ALERT_2_G | Short Inter X...Y Contact                        | Cl34   | .. C173 | .. 1.55 Ang.     |
| PLAT432_ALERT_2_G | Short Inter X...Y Contact                        | O1     | .. C173 | .. 2.97 Ang.     |
| PLAT432_ALERT_2_G | Short Inter X...Y Contact                        | O150   | .. C191 | .. 2.98 Ang.     |
| PLAT432_ALERT_2_G | Short Inter X...Y Contact                        | O256   | .. C137 | .. 2.62 Ang.     |
| PLAT432_ALERT_2_G | Short Inter X...Y Contact                        | O256   | .. C99  | .. 2.99 Ang.     |
| PLAT432_ALERT_2_G | Short Inter X...Y Contact                        | O256   | .. C157 | .. 3.00 Ang.     |
| PLAT432_ALERT_2_G | Short Inter X...Y Contact                        | C25    | .. C185 | .. 3.13 Ang.     |
| PLAT432_ALERT_2_G | Short Inter X...Y Contact                        | C66    | .. C185 | .. 3.16 Ang.     |
| PLAT432_ALERT_2_G | Short Inter X...Y Contact                        | C87    | .. C185 | .. 2.66 Ang.     |
| PLAT432_ALERT_2_G | Short Inter X...Y Contact                        | C173   | .. C224 | .. 1.08 Ang.     |
| PLAT720_ALERT_4_G | Number of Unusual/Non-Standard Labels .....      |        |         | 9 Note           |
| PLAT779_ALERT_4_G | Suspect or Irrelevant (Bond) Angle in CIF .... # |        |         | 1 Check          |
|                   | CL1A -CL6 -C173                                  | 1.555  | 1.555   | 1.555 44.80 Deg. |
| PLAT790_ALERT_4_G | Centre of Gravity not Within Unit Cell: Resd. #  |        |         | 8 Note           |
|                   | C H Cl3                                          |        |         |                  |
| PLAT790_ALERT_4_G | Centre of Gravity not Within Unit Cell: Resd. #  |        |         | 9 Note           |
|                   | C H Cl3                                          |        |         |                  |
| PLAT790_ALERT_4_G | Centre of Gravity not Within Unit Cell: Resd. #  |        |         | 14 Note          |
|                   | C H Cl3                                          |        |         |                  |
| PLAT790_ALERT_4_G | Centre of Gravity not Within Unit Cell: Resd. #  |        |         | 15 Note          |
|                   | C Cl                                             |        |         |                  |
| PLAT790_ALERT_4_G | Centre of Gravity not Within Unit Cell: Resd. #  |        |         | 17 Note          |
|                   | Cl                                               |        |         |                  |
| PLAT790_ALERT_4_G | Centre of Gravity not Within Unit Cell: Resd. #  |        |         | 18 Note          |
|                   | Cl                                               |        |         |                  |
| PLAT790_ALERT_4_G | Centre of Gravity not Within Unit Cell: Resd. #  |        |         | 19 Note          |
|                   | Cl                                               |        |         |                  |
| PLAT790_ALERT_4_G | Centre of Gravity not Within Unit Cell: Resd. #  |        |         | 20 Note          |
|                   | Cl                                               |        |         |                  |
| PLAT790_ALERT_4_G | Centre of Gravity not Within Unit Cell: Resd. #  |        |         | 21 Note          |
|                   | O                                                |        |         |                  |
| PLAT790_ALERT_4_G | Centre of Gravity not Within Unit Cell: Resd. #  |        |         | 23 Note          |
|                   | H                                                |        |         |                  |
| PLAT790_ALERT_4_G | Centre of Gravity not Within Unit Cell: Resd. #  |        |         | 24 Note          |
|                   | H                                                |        |         |                  |
| PLAT791_ALERT_4_G | The Model has Chirality at C82 (Chiral SPGR)     |        |         | R Verify         |
| PLAT791_ALERT_4_G | The Model has Chirality at C85 (Chiral SPGR)     |        |         | R Verify         |

|                   |                                                  |               |          |
|-------------------|--------------------------------------------------|---------------|----------|
| PLAT791_ALERT_4_G | The Model has Chirality at C86                   | (Chiral SPGR) | R Verify |
| PLAT791_ALERT_4_G | The Model has Chirality at C90                   | (Chiral SPGR) | R Verify |
| PLAT791_ALERT_4_G | The Model has Chirality at C98                   | (Chiral SPGR) | R Verify |
| PLAT791_ALERT_4_G | The Model has Chirality at C102                  | (Chiral SPGR) | R Verify |
| PLAT791_ALERT_4_G | The Model has Chirality at C103                  | (Chiral SPGR) | R Verify |
| PLAT791_ALERT_4_G | The Model has Chirality at C107                  | (Chiral SPGR) | R Verify |
| PLAT791_ALERT_4_G | The Model has Chirality at C123                  | (Chiral SPGR) | R Verify |
| PLAT791_ALERT_4_G | The Model has Chirality at C129                  | (Chiral SPGR) | R Verify |
| PLAT791_ALERT_4_G | The Model has Chirality at C130                  | (Chiral SPGR) | R Verify |
| PLAT791_ALERT_4_G | The Model has Chirality at C153                  | (Chiral SPGR) | R Verify |
| PLAT791_ALERT_4_G | The Model has Chirality at C167                  | (Chiral SPGR) | R Verify |
| PLAT791_ALERT_4_G | The Model has Chirality at C176                  | (Chiral SPGR) | R Verify |
| PLAT791_ALERT_4_G | The Model has Chirality at C101                  | (Chiral SPGR) | R Verify |
| PLAT791_ALERT_4_G | The Model has Chirality at C177                  | (Chiral SPGR) | R Verify |
| PLAT811_ALERT_5_G | No ADDSYM Analysis: Too Many Excluded Atoms .... |               | ! Info   |
| PLAT860_ALERT_3_G | Number of Least-Squares Restraints .....         |               | 336 Note |

---

0 **ALERT level A** = Most likely a serious problem - resolve or explain  
3 **ALERT level B** = A potentially serious problem, consider carefully  
27 **ALERT level C** = Check. Ensure it is not caused by an omission or oversight  
67 **ALERT level G** = General information/check it is not something unexpected

6 ALERT type 1 CIF construction/syntax error, inconsistent or missing data  
47 ALERT type 2 Indicator that the structure model may be wrong or deficient  
7 ALERT type 3 Indicator that the structure quality may be low  
34 ALERT type 4 Improvement, methodology, query or suggestion  
3 ALERT type 5 Informative message, check

---

## checkCIF publication errors

---

### Alert level A

PUBL002\_ALERT\_1\_A The contact author's address is missing,  
    \_publ\_contact\_author\_address.

PUBL005\_ALERT\_1\_A \_publ\_contact\_author\_email, \_publ\_contact\_author\_fax and  
    \_publ\_contact\_author\_phone are all missing.  
    At least one of these should be present.

PUBL006\_ALERT\_1\_A \_publ\_requested\_journal is missing  
    e.g. 'Acta Crystallographica Section C'

PUBL008\_ALERT\_1\_A \_publ\_section\_title is missing. Title of paper.

PUBL009\_ALERT\_1\_A \_publ\_author\_name is missing. List of author(s) name(s).

PUBL010\_ALERT\_1\_A \_publ\_author\_address is missing. Author(s) address(es).

PUBL012\_ALERT\_1\_A \_publ\_section\_abstract is missing.  
    Abstract of paper in English.

---

7 **ALERT level A** = Data missing that is essential or data in wrong format  
0 **ALERT level G** = General alerts. Data that may be required is missing

---

## Publication of your CIF

You should attempt to resolve as many as possible of the alerts in all categories. Often the minor alerts point to easily fixed oversights, errors and omissions in your CIF or refinement strategy, so attention to these fine details can be worthwhile. In order to resolve some of the more serious problems it may be necessary to carry out additional measurements or structure refinements. However, the nature of your study may justify the reported deviations from journal submission requirements and the more serious of these should be commented upon in the discussion or experimental section of a paper or in the "special\_details" fields of the CIF. *checkCIF* was carefully designed to identify outliers and unusual parameters, but every test has its limitations and alerts that are not important in a particular case may appear. Conversely, the absence of alerts does not guarantee there are no aspects of the results needing attention. It is up to the individual to critically assess their own results and, if necessary, seek expert advice.

If level A alerts remain, which you believe to be justified deviations, and you intend to submit this CIF for publication in a journal, you should additionally insert an explanation in your CIF using the Validation Reply Form (VRF) below. This will allow your explanation to be considered as part of the review process.

## Validation response form

Please find below a validation response form (VRF) that can be filled in and pasted into your CIF.

```
# start Validation Reply Form
_vrf_PUBL002_GLOBAL
;
PROBLEM: The contact author's address is missing,
RESPONSE: ...
;
_vrf_PUBL005_GLOBAL
;
PROBLEM: _publ_contact_author_email, _publ_contact_author_fax and
RESPONSE: ...
;
_vrf_PUBL006_GLOBAL
;
PROBLEM: _publ_requested_journal is missing
RESPONSE: ...
;
_vrf_PUBL008_GLOBAL
;
PROBLEM: _publ_section_title is missing. Title of paper.
RESPONSE: ...
;
_vrf_PUBL009_GLOBAL
;
PROBLEM: _publ_author_name is missing. List of author(s) name(s).
RESPONSE: ...
;
_vrf_PUBL010_GLOBAL
;
PROBLEM: _publ_author_address is missing. Author(s) address(es).
RESPONSE: ...
;
_vrf_PUBL012_GLOBAL
;
```

PROBLEM: \_publ\_section\_abstract is missing.  
RESPONSE: ...  
;  
# end Validation Reply Form

If you wish to submit your CIF for publication in Acta Crystallographica Section C or E, you should upload your CIF via the web. If your CIF is to form part of a submission to another IUCr journal, you will be asked, either during electronic submission or by the Co-editor handling your paper, to upload your CIF via our web site.

---

**PLATON version of 20/08/2014; check.def file version of 19/12/2014**

Datablock I - ellipsoid plot

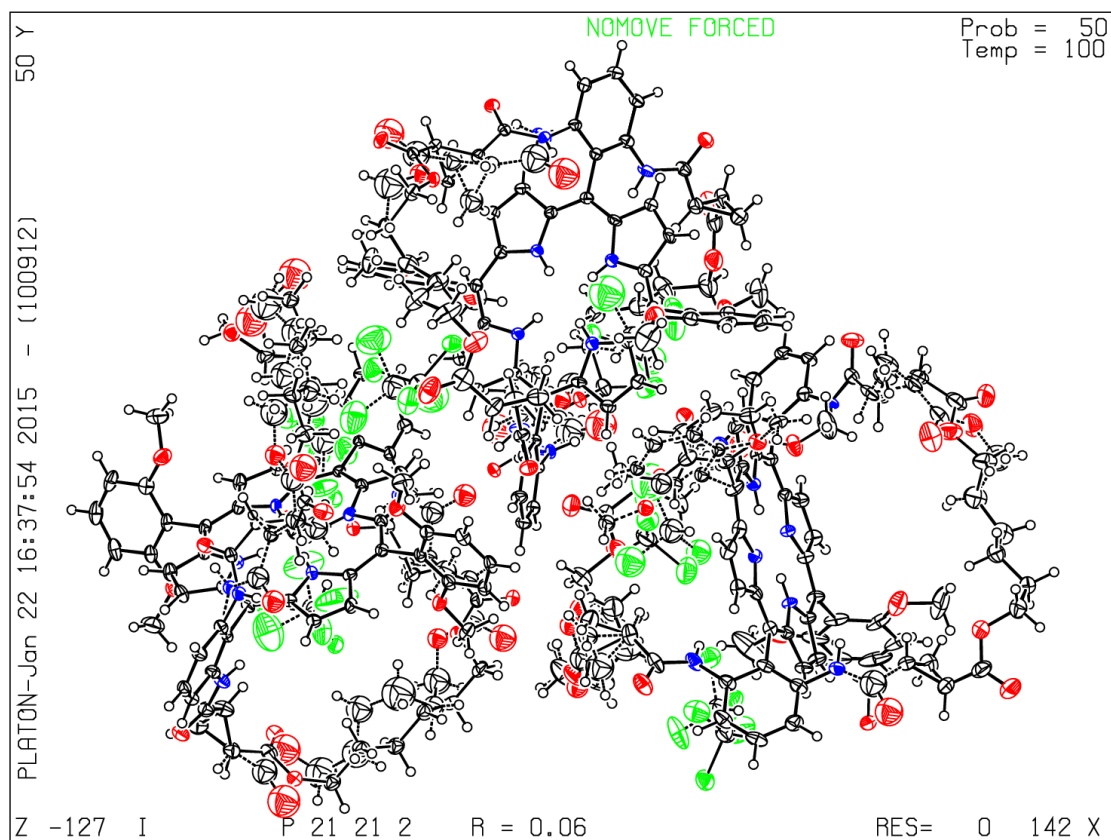

Supplement: Supplementary file 6 [file 16641833]
